# Supplementary material for: Prevalence and Epidemiological and Clinical Features of Bacterial Infections in a Large Cohort of Patients Hospitalized for COVID-19 in Southern Italy: A Multicenter Study
Source: MDPI journal article supplement (doi:10.3390/antibiotics12071124), 2023-06-29
Supplement: s1 [file s1]

**Supplementary Table S1.** Demographic, clinical, and biochemical characteristics of patients who received antimicrobial prescriptions, according to the presence of bacterial infection.

|                                                   | Bacterial infection | No bacterial infection | P value          |
|---------------------------------------------------|---------------------|------------------------|------------------|
| <b>N° of patients</b>                             | 155                 | 323                    |                  |
| <b>Mean age (SD), years</b>                       | 63.2 (16.9)         | 66.2 (15.5)            | 0.06             |
| <b>Males, n° (%)</b>                              | 106 (68.4)          | 200 (61.9)             | 0.17             |
| <b>Mean length of hospital stay (SD), days</b>    | 17.6 (10.6)         | 16.1 (10.4)            | 0.12             |
| <b>Admitted to ID wards, n° (%)</b>               | 151 (97.4)          | 277 (85.8)             | <b>&lt;0.001</b> |
| <b>Charlson Comorbidity Index (median, range)</b> | 3 (4)               | 3 (4)                  | 0.46             |
| <b>Comorbidities, n° (%)</b>                      |                     |                        |                  |
| - Cardiovascular disease                          | 49 (31.6)           | 99 (30.6)              | 0.88             |
| - Diabetes                                        | 40 (25.8)           | 77 (23.8)              | 0.68             |
| - COPD                                            | 14 (9)              | 36 (11.1)              | 0.46             |
| - Chronic kidney disease                          | 25 (16.1)           | 34 (10.5)              | 0.08             |
| - Chronic liver disease                           | 12 (7.7)            | 12 (3.7)               | 0.09             |
| - Malignancies                                    | 14 (9)              | 29 (9)                 | 0.99             |
| - HIV                                             | 2 (1.3)             | 1 (0.3)                | 0.21             |
| <b>Severity of COVID-19 disease, n° (%)</b>       |                     |                        |                  |
| - Mild or Moderate                                | 67 (43.2)           | 100 (31)               | <b>0.008</b>     |
| - Severe/Critical                                 | 88 (56.8)           | 223 (69)               |                  |
| <b>SOFA score (median, IQR)</b>                   | 1 (4)               | 3 (2)                  | <b>&lt;0.001</b> |
| <b>Supplemental oxygen therapy, n° (%)</b>        |                     |                        | <b>&lt;0.001</b> |
| - None                                            | 20 (12.9)           | 24 (7.4)               |                  |
| - Nasal cannula or simple face mask               | 95 (61.3)           | 125 (38.7)             |                  |
| - HFNC                                            | 17 (11)             | 32 (9.9)               |                  |
| - CPAP/NIV                                        | 19 (12.3)           | 133 (41.2)             |                  |
| - Mechanical ventilation                          | 3 (1.9)             | 6 (1.9)                |                  |
| <b>Baseline laboratory parameter (mean, SD)</b>   |                     |                        |                  |
| - WBC (x1000/ $\mu$ l)                            | 10.08 (9.4)         | 9.8 (4.2)              | 0.74             |
| - Lymphocytes count (x1000/ $\mu$ l)              | 1.6 (6.9)           | 1.0 (0.6)              | 0.23             |
| - INR                                             | 1.2 (0.5)           | 1.2 (0.8)              | 0.33             |
| - Creatinine (mg/dl)                              | 1.6 (1.8)           | 1.2 (1.2)              | 0.32             |
| - ALT (UI/ml)                                     | 56.8 (81.3)         | 52.4 (85.4)            | 0.60             |
| - Total bilirubin (mg/dl)                         | 0.8 (1.2)           | 0.9 (2.2)              | 0.16             |
| - PCR (x ULN)                                     | 15.6 (49)           | 23.3 (105)             | 0.38             |
| <b>Corticosteroid treatment, n° (%)</b>           | 142 (91.6)          | 303 (93.8)             | 0.51             |
